# Supplementary material for: Cytosolic N6AMT1-dependent translation supports mitochondrial RNA processing
Source: PubMed Central journal article supplement (PMC11588129; doi:10.1073/pnas.2414187121), 2024-11-06
Supplement: pnas.2414187121.sapp.pdf [file pnas.2414187121.sapp.pdf]

## Supporting Information for Cytosolic N6AMT1-dependent translation supports mitochondrial RNA processing

Mads M. Foged<sup>a</sup>, Emeline Recazens<sup>a,1</sup>, Sylvain Chollet<sup>a,1</sup>, Miriam Lisci<sup>a</sup>, George E. Allen<sup>b</sup>, Boris Zinshteyn<sup>c,d</sup>, Doha Boutguetaï<sup>e</sup>, Christian Münch<sup>e</sup>, Vamsi K. Mootha<sup>f,g,h,i</sup> and Alexis A. Jourdain<sup>a,2</sup>

<sup>a</sup>Department of Immunobiology, University of Lausanne, 1066 Epalinges, Switzerland

<sup>b</sup>Department of Microbiology and Molecular Medicine, Institute of Genetics and Genomics Geneva, Faculty of Medicine, University of Geneva, 1211 Geneva 4, Switzerland

<sup>c</sup>Howard Hughes Medical Institute, Johns Hopkins University School of Medicine, Baltimore, MD 21205

<sup>d</sup>Department of Molecular Biology and Genetics, Johns Hopkins University School of Medicine, Baltimore, MD 21205

<sup>e</sup>Institute of Molecular Systems Medicine, Faculty of Medicine, Goethe University Frankfurt, 60590 Frankfurt am Main, Germany

<sup>f</sup>Broad Institute of Massachusetts Institute of Technology and Harvard, Cambridge, MA 02142

<sup>g</sup>Howard Hughes Medical Institute, Massachusetts General Hospital Boston, MA 02114

<sup>h</sup>Department of Molecular Biology, Massachusetts General Hospital, Boston, MA 02114

<sup>i</sup>Department of Systems Biology, Harvard Medical School, Boston, MA 02115

<sup>1</sup>Co-second authors

<sup>2</sup>Corresponding author: Alexis A. Jourdain

Email: [alexis.jourdain@unil.ch](mailto:alexis.jourdain@unil.ch)

### This PDF file includes:

Figures S1 to S5  
Tables S1 to S4

### Other supporting materials for this manuscript include the following:

Datasets S1 to S13

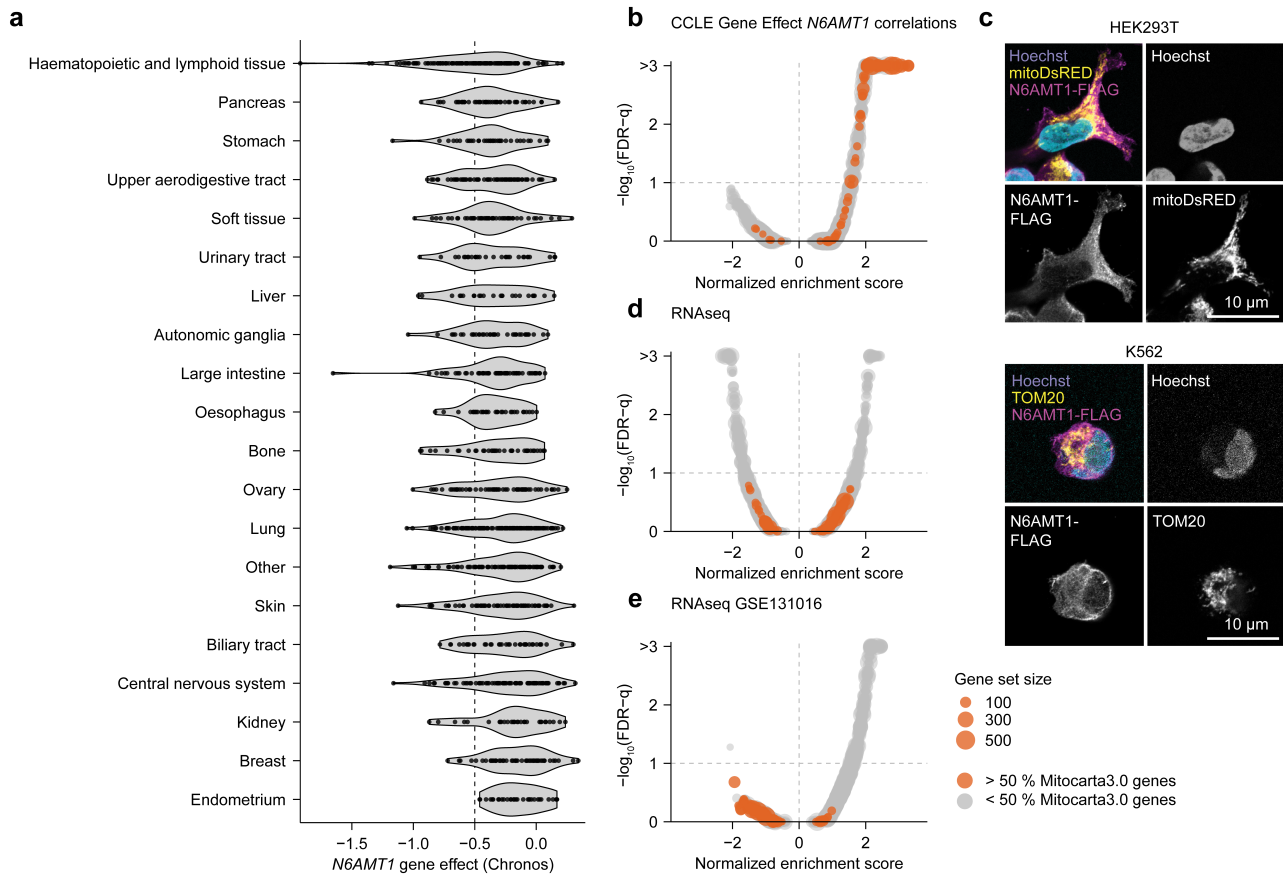

**Figure S1. Additional analyses, related to Figure 1.**

**A)** Violin plots showing distributions of  $N6AMT1$  CCLE Chronos scores by lineage. Lineages are ordered by increasing mean Chronos score.

**B)** Gene set enrichment analyses of correlations shown in Figure 1B. Gene sets with more than 50% MitoCarta3.0 genes are highlighted in orange.

**C)** Immunofluorescence analysis of  $N6AMT1$  localization in HEK293T and K562 cells. Cells were transduced with  $N6AMT1$ -3xFLAG cDNA and immunolabelled with anti-FLAG. Mitochondria were visualized by mitoDsRED or anti-TOM20. Nuclei were visualized by Hoechst staining.

**D-E)** Gene set enrichment analyses of RNA-Seq shown in Figure 1F (C), and a publicly available RNA-Seq dataset comparing A549 control cell lines with siRNA-mediated  $N6AMT1$  knockdown (dataset GSE131016 in the Gene Expression Omnibus database) (D) showing no change in MitoCarta3.0 transcripts. Gene sets with more than 50% MitoCarta3.0 genes are highlighted in orange.

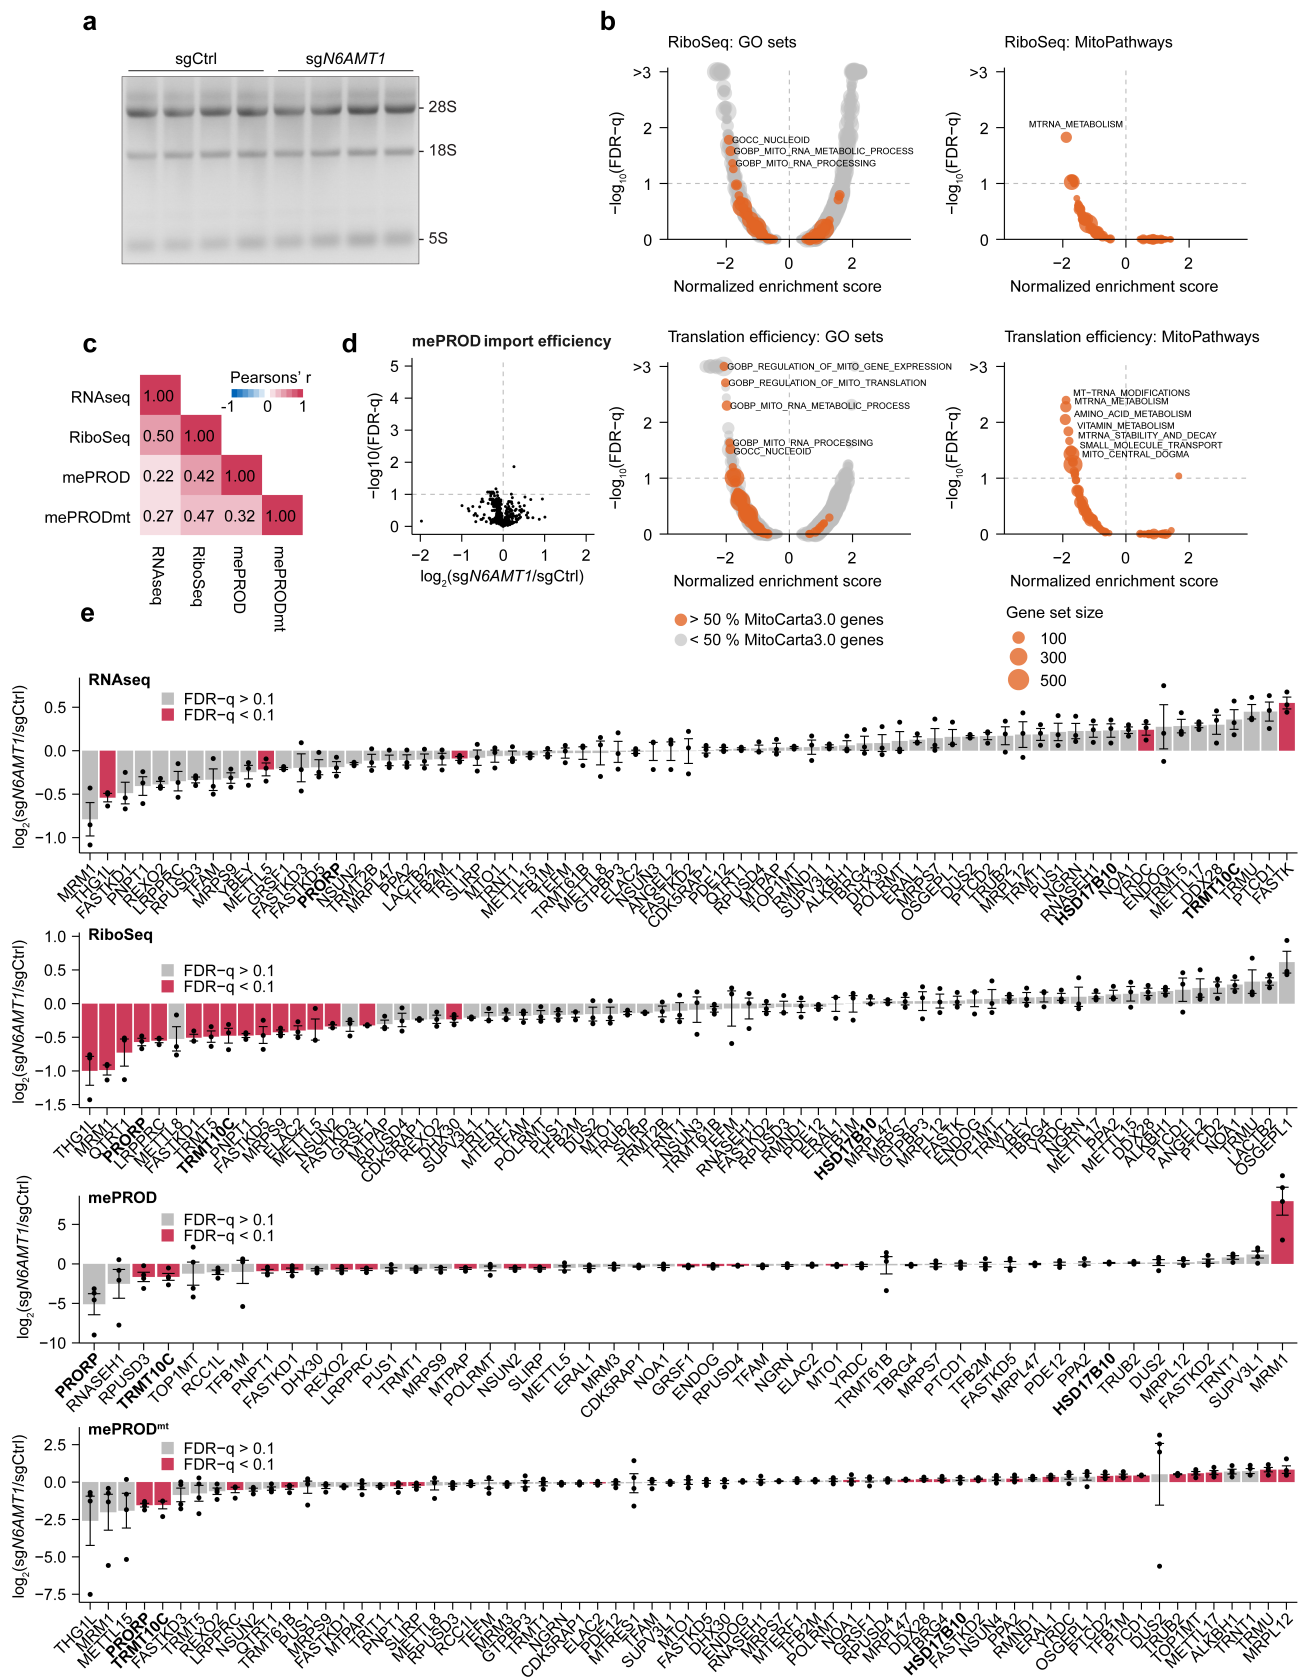

**Figure S2. Additional analyses related to Figure 2.**

**A)** RNA-agarose gel (basis for the quantification in 2A), comparing control to *N6AMT1*-depleted K562 cell lines 10 days post sgRNA transduction (n = 4 independent lentiviral infections per condition). Major ribosomal RNA (rRNA) peaks are indicated.

**B)** Gene set enrichment analyses of  $\log_2$  (fold-change) values from ribosome profiling analysis (upper panels) and calculated translation efficiencies (ribosome-protected fragments / mRNA abundance; lower panels) based on Gene Ontology (GO) terms (left panels) or MitoPathways gene sets (right panels). Gene sets with > 50% MitoCarta3.0 genes are highlighted in orange.

**C)** Pearson's correlation coefficients between RNA-Seq, Ribo-Seq, mePROD, and mePROD<sup>mt</sup> datasets.

**D)** Mitochondrial import analysis ( $\log_2$ -transformed fold-changes in mePROD<sup>mt</sup> expression / mePROD expression ratios) in *N6AMT1*-depleted K562 as compared to control cells. n = 4 independent lentiviral transduction per condition.

**E)** Bar plots showing ranked  $\log_2$  (fold-changes) of all genes belonging to the "mt-RNA metabolism" MitoPathways gene set in each of the four indicated datasets. Points represent  $\log_2$  (fold-change) values for each independent replicate in the *N6AMT1*-depleted cells as compared to K562 cells. Error bars represent mean +/- standard error of the mean (n = 3-4 independent transduction per condition). Genes highlighted in red are significant at a false-discovery rate (FDR) of 0.1 (Benjamini-Hochberg).



**Figure S3. Additional analyses related to Figure 3.**

**A)** Schematic representation of mitochondrial RNA processing by mitochondrial RNase P and Z. Mitochondrial RNase P is composed of TRMT10C (MRPP1), HSD17B10 (MRPP2), PRORP (MRPP3).

**B)** Illustration of MitoString to monitor mt-RNA processing defects. Three classes of probes targeting tRNA-mRNA junctions, noncoding regions, or regions within mRNAs are employed. Upon processing and degradation, junction-targeted probes or probes targeting non-coding regions are unable to bind their corresponding mt-RNA, thus showing reduced signal relative to mRNA-targeted probes.

**C)** Protein immunoblot showing mitochondrial RNase P subunit PRORP protein levels in control (sgCtrl) and *N6AMT1*-depleted (sg*N6AMT1*) K562 cells with introduction of cDNA encoding either GFP, wild type *N6AMT1* or catalytically inactive *N6AMT1*-D77A.

**D)** qPCR analysis of RNase P-encoding transcripts in control or *N6AMT1*-depleted K562 cells, with introduction of either 2 different *GFP* cDNAs or *TRMT10C* + *PRORP* cDNA (n = 3 independent lentiviral infections).

**E)** Immunoblot showing mitochondrial RNase P subunits in control or *N6AMT1*-depleted K562 with the introduction of either 2 different *GFP* cDNAs or a combination of *TRMT10C* and *PRORP* cDNA.

**F)** Unsupervised clustering of MitoString data presented in Figure 3A with that of Wolf and Mootha (2014), illustrating the clustering of *N6AMT1*-depletion (sg*N6AMT1* + GFP) with depletion of mitochondrial RNase P (*TRMT10C*, *HSD17B10*) and RNase Z (*ELAC2*) proteins.

**G)** Proteomics protein abundance of mitochondrial proteins annotated as each of the six top-level pathway annotations in the MitoPathways database.

**H)** Proteomics protein abundance of mitochondrial OXPHOS proteins annotated according to OXPHOS complex as defined in the MitoPathways database.

**I)** Proteomics protein abundance of mitochondrial complex 5 subunits annotated according to complex V subdomains.

Uncropped immunoblots for Figure 1e

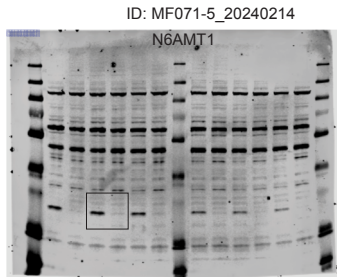

Primary antibody:  
LS-C346278 (LSBio) 1:1,000  
Secondary antibody:  
IRDye® 800CW Goat anti-Rabbit  
IgG Secondary Antibody 1:10,000

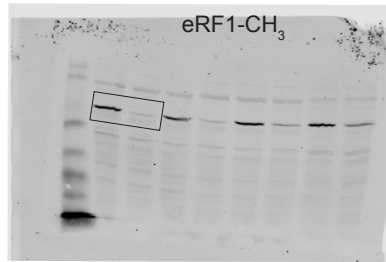

Primary antibody:  
anti-eRF1-CH3  
Secondary antibody:  
IRDye® 800CW Goat anti-Rabbit  
IgG Secondary Antibody 1:10,000

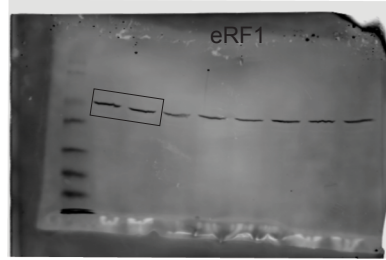

Primary antibody:  
ab31799 (Abcam) 1:1,000  
Secondary antibody:  
IRDye® 680RD Goat anti-Mouse IgG  
Secondary Antibody 1:10,000

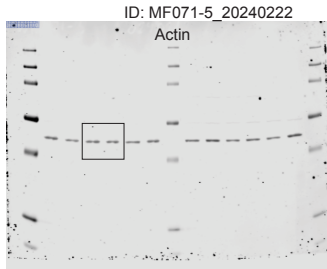

Primary antibody:  
A1978 (Sigma) 1:1,000  
Secondary antibody:  
IRDye® 680RD Goat anti-Mouse IgG  
Secondary Antibody 1:10,000

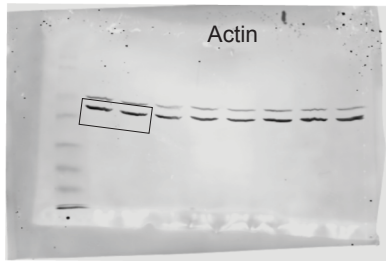

Primary antibody:  
A1978 (Sigma) 1:1,000  
Secondary antibody:  
IRDye® 680RD Goat anti-Mouse IgG  
Secondary Antibody 1:10,000

Uncropped immunoblots for Figure 1g

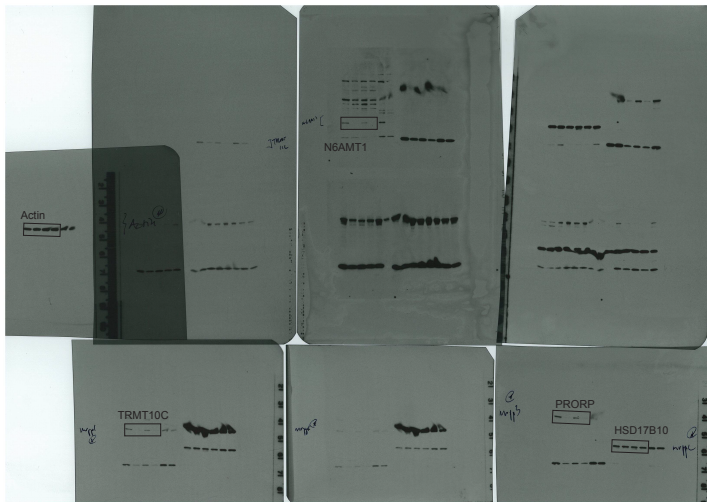

Uncropped immunoblots for Figure 3e

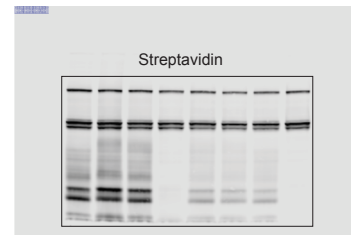

Detection by:  
IRDye® 800CW Streptavidin 1:10,000

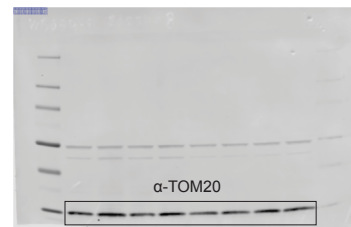

Primary Antibody:  
42406 (Cell Signaling Technology), 1:1,000  
Secondary antibody:  
IRDye® 680RD Goat anti-Mouse IgG  
Secondary Antibody 1:10,000

**Figure S4. Uncropped immunoblots for Figures 1E, 1G and 3E.**

**Uncropped immunoblots for Figure S3c**

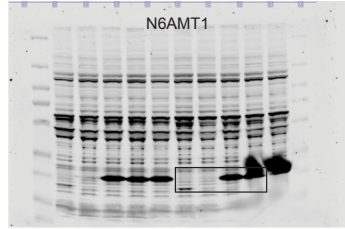

Primary antibody:  
LS-C346278 (LSBio) 1:1,000  
Secondary antibody:  
IRDye® 800CW Goat anti-Rabbit  
IgG Secondary Antibody 1:10,000

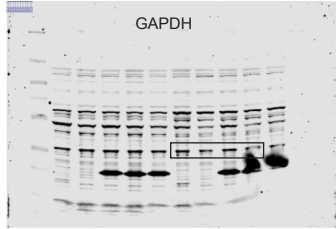

Primary antibody:  
5174T (Cell Signaling Technology) 1:1,000  
Secondary antibody:  
IRDye® 800CW Goat anti-Rabbit  
IgG Secondary Antibody 1:10,000

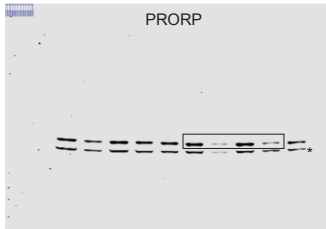

\*: methylated eRF1  
Primary antibody:  
ab185942 (Abcam) 1:1,000  
Secondary antibody:  
IRDye® 800CW Goat anti-Rabbit  
IgG Secondary Antibody 1:10,000

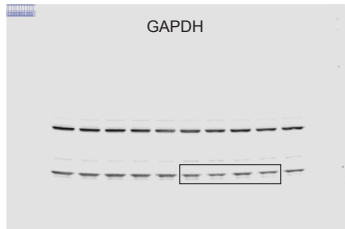

Primary antibody:  
5174T (Cell Signaling Technology) 1:1,000  
Secondary antibody:  
IRDye® 800CW Goat anti-Rabbit  
IgG Secondary Antibody 1:10,000

**Uncropped immunoblots for Figure S3e**

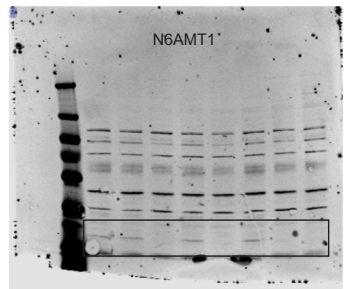

Primary antibody:  
LS-C346278 (LSBio) 1:1,000  
Secondary antibody:  
IRDye® 800CW Goat anti-Rabbit  
IgG Secondary Antibody 1:10,000

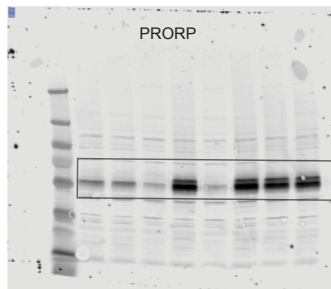

Primary antibody:  
ab185942 (Abcam) 1:1,000  
Secondary antibody:  
IRDye® 800CW Goat anti-Rabbit  
IgG Secondary Antibody 1:10,000

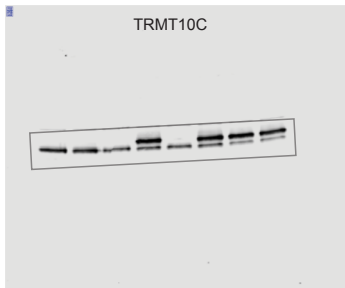

Primary antibody:  
HPA036671 (Sigma) 1:1,000  
Secondary antibody:  
IRDye® 800CW Goat anti-Rabbit  
IgG Secondary Antibody 1:10,000

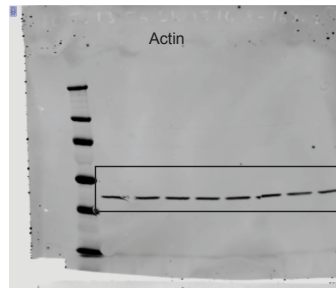

Primary antibody:  
A1978 (Sigma) 1:1,000  
Secondary antibody:  
IRDye® 680RD Goat anti-Mouse IgG  
Secondary Antibody 1:10,000

**Figure S5. Uncropped immunoblots for Figures S3C and S3E.**



**Table S1. sgRNAs, cDNAs and primers used in this study**

| ID                   | Sequence                                                                                                                                                                                                                                                                                                                                                                                                                                                                                                                                                                                                                                                                                                                                                                                                                                                                                                                                                                                                                                                                                                                                                                                                                                                                                                                                                                                                                                                                     | Type   | Purpose                                |
|----------------------|------------------------------------------------------------------------------------------------------------------------------------------------------------------------------------------------------------------------------------------------------------------------------------------------------------------------------------------------------------------------------------------------------------------------------------------------------------------------------------------------------------------------------------------------------------------------------------------------------------------------------------------------------------------------------------------------------------------------------------------------------------------------------------------------------------------------------------------------------------------------------------------------------------------------------------------------------------------------------------------------------------------------------------------------------------------------------------------------------------------------------------------------------------------------------------------------------------------------------------------------------------------------------------------------------------------------------------------------------------------------------------------------------------------------------------------------------------------------------|--------|----------------------------------------|
| N6AMT1 sg1           | CAGCGACGTGTACGAGCCCG                                                                                                                                                                                                                                                                                                                                                                                                                                                                                                                                                                                                                                                                                                                                                                                                                                                                                                                                                                                                                                                                                                                                                                                                                                                                                                                                                                                                                                                         | sgRNA  | N6AMT1 depletion                       |
| N6AMT1 sg2           | GGGTACAAGCTGCTGCCTCA                                                                                                                                                                                                                                                                                                                                                                                                                                                                                                                                                                                                                                                                                                                                                                                                                                                                                                                                                                                                                                                                                                                                                                                                                                                                                                                                                                                                                                                         | sgRNA  | N6AMT1 depletion                       |
| Control sg1 (OR11A1) | GTGATGCCAAAAATGCTGGA                                                                                                                                                                                                                                                                                                                                                                                                                                                                                                                                                                                                                                                                                                                                                                                                                                                                                                                                                                                                                                                                                                                                                                                                                                                                                                                                                                                                                                                         | sgRNA  | CRISPR control                         |
| Control sg2 (OR2M4)  | CCATAAGGGACAGTTGACTG                                                                                                                                                                                                                                                                                                                                                                                                                                                                                                                                                                                                                                                                                                                                                                                                                                                                                                                                                                                                                                                                                                                                                                                                                                                                                                                                                                                                                                                         | sgRNA  | CRISPR control                         |
| EGFP sg1             | GGGCGAGGAGCTGTTACCCG                                                                                                                                                                                                                                                                                                                                                                                                                                                                                                                                                                                                                                                                                                                                                                                                                                                                                                                                                                                                                                                                                                                                                                                                                                                                                                                                                                                                                                                         | sgRNA  | CRISPR control                         |
| N6AMT1-3xFLAG        | ATGGCAGGGGAGAACTTCGCTACGCCGTTCCACGGGCACGTGGGCCGCGGGGCTTTTAGTGATGTTTATGAACCTGCTGAGGACACGTTTCTGCTTTTGGACGCGCTGGAGGCAGCGGCTGCCGAAGTGGCAGGAGTGGAAATATGCCTGGAAGTAGGGTCAGGGTCTGGTGTAGTATCTGCATTCCCTAGCCTCTATGATAGGCCTCAAGCCTTATATATGTGTACTGATATCAACCCTGAAGCGGCTGCCTGCACGCTAGAGACAGCAGCTGTAACAAAGTTCACATTCAACCAGTTATTACAGATTGGTCAAAGGCTTGCTACCAAGATTGACCGAAAAAGTTGATCTTCTGGTGTAAATCCCCCTATGTAGTGACTCCACCTCAAGAGGTAGGAAGTCACGAAATAGAGGCAGCTTGGGCTGGTGGCAGAAATGGTCGGGAAGTCATGGACAGGTTTTTCCCTGGTCCAGATCTCCTTTCACCAAGAGGATATTCTATTTAGTTACCATTAAGAAAAACAACCCAGAAGAAATTTTGAAAAATAATGAAGACAAAAGGCTGCAAGGAACCACTGCACCTTCCAGACAAGCAGGCCAAGAACTCTTTCAGTCCCAAGTTCACCAAGTCTGATTATAAAGATCATGATGGCGATTATAAAGATCATGATATTGATTATAAAGATGATGATGATAAATAATAGTGAATGGCAGGGGAGAACTTCGCTACGCCGTTCCACGGGCACGTGGGCCGCGGGGCTTTTAGTGATGTTTATGAACCTGCTGAGGACACGTTTCTGCTTTTGACGCGCTGGAGGCAGCGGCTGCCGAAGTGGCAGGAGTGGAAATATGCCTGGAAGTAGGGTCAGGGTCTGGTGTAGTATCTGCATTCCCTAGCCTCTATGATAGAGCCCTCAAGCCTTATATATGTGTACTGATATCAACCCTGAAGCGGCTGCCTGCACGCTAGAGACAGCAGCTGTAACAAAGTTCACATTCAACCAGTTATTACAGATTTGGTCAAAGGCTTGCTACCAAGATTGACCGAAAAAGTTGATCTTCTGGTGTAAATCCCCCTATGTAGTGACTCCACCTCAAGAGGTAGGAAGTCACGAAATAGAGGCAGCTTGGGCTGGTGGCAGAAATGGTCGGGAAGTCATGGACAGGTTTTTCCCTGGTCCAGATCTCCTTTCACCAAGAGGATTTATTCATTTAGTTACCATTAAGAAAAACAACCCAGAAGAAATTTTGAAAAATAATGAAGACAAAAGGCTGCAAGGAACCACTGCACCTTCCAGACAAGCAGGCCAA GAAACTCTTTCAGTCCCAAGTTCACCAAGTCTGATTATAAAGATCATGATGGCGATTATAAAGATCATGATATTGATTATAAAGATGATGATGATAAATAA TAGTGA | cDNA   | sgRNA-resistant                        |
| D77A_s               | GCCATCAACCCtgaagcggtgcc                                                                                                                                                                                                                                                                                                                                                                                                                                                                                                                                                                                                                                                                                                                                                                                                                                                                                                                                                                                                                                                                                                                                                                                                                                                                                                                                                                                                                                                      | Primer | Introduce D77A mutation in N6AMT1 cDNA |
| D77A_as              | AGTACACATATATAAGGCTTGAGGGCC                                                                                                                                                                                                                                                                                                                                                                                                                                                                                                                                                                                                                                                                                                                                                                                                                                                                                                                                                                                                                                                                                                                                                                                                                                                                                                                                                                                                                                                  | Primer | Introduce D77A mutation in N6AMT1 cDNA |

**Table S2. qPCR probes used in this study**

| ID           | Source                   | Catalog number   | forward primer                | reverse primer                   | probe                                             |
|--------------|--------------------------|------------------|-------------------------------|----------------------------------|---------------------------------------------------|
| TRNM-MT-ND2  | Thermo Fisher Scientific | Custom probe     | CCCATACCCCG<br>AAAATGTTGGTTAT | CCTGCAAAGATGGTAGAGTAGATGA        | CCCGTACTAATTAATCCC                                |
| MT-ND3-TRNR  | Thermo Fisher Scientific | Custom probe     | CCCTAAGTCTGG<br>CCTATGAGTGA   | AATGAGTCGAAATCATTCTGTTTTGTTTAACT | ACCAATTCGGTTCAGTCTAA                              |
| MT-RNR2-TRNL | Thermo Fisher Scientific | Custom probe     | CCACACCCACC<br>CAAGAACAG      | AGTTTTATGCGATTACCGGGCT           | CTGCCATCTTAACAAACC                                |
| TRNV-MT-RNR2 | Thermo Fisher Scientific | Custom probe     | CCACACCCACC<br>CAAGAACAG      | AGTTTTATGCGATTACCGGGCT           | CTGCCATCTTAACAAACC                                |
| TRNM-MT-ND2  | IDT                      | Custom probe     | CCCATACCCCG<br>AAAATGTTGGTTAT | CCTGCAAAGATGGTAGAGTAGATGA        | CCCGTACTAATTAATCCC                                |
| MT-ND3-TRNR  | IDT                      | Custom probe     | CCCTAAGTCTG<br>GCCTATGAGTGA   | AATGAGTCGAAATCATTCTGTTTTGTTTAACT | ACCAATTCGGTTCAGTCTAA                              |
| MT-RNR2-TRNL | IDT                      | Custom probe     | CCACACCCACC<br>CAAGAACAG      | AGTTTTATGCGATTACCGGGCT           | CTGCCATCTTAACAAACC                                |
| TRNV-MT-RNR2 | IDT                      | Custom probe     | CCACACCCACC<br>CAAGAACAG      | AGTTTTATGCGATTACCGGGCT           | CTGCCATCTTAACAAACC                                |
| MT-RNR2      | Thermo Fisher Scientific | Hs02596860_s1    |                               |                                  |                                                   |
| MT-ND2       | Thermo Fisher Scientific | Hs02596874_g1    |                               |                                  |                                                   |
| MT-ND3       | Thermo Fisher Scientific | Hs02596875_s1    |                               |                                  |                                                   |
| N6AMT1       | Thermo Fisher Scientific | Hs01061650_g1    |                               |                                  |                                                   |
| PNPT1        | Thermo Fisher Scientific | Hs01105971_m1    |                               |                                  |                                                   |
| IFNB1        | Thermo Fisher Scientific | Hs01077958_s1    |                               |                                  |                                                   |
| USP18        | Thermo Fisher Scientific | Hs00276441_m1    |                               |                                  |                                                   |
| IFIT1        | Thermo Fisher Scientific | Hs03027069_s1    |                               |                                  |                                                   |
| GBP2         | Thermo Fisher Scientific | Hs00894837_m1    |                               |                                  |                                                   |
| 18S rRNA     | Thermo Fisher Scientific | Hs03003631_g1    |                               |                                  |                                                   |
| TRMT10C      | Thermo Fisher Scientific | Hs01933516_s1    |                               |                                  |                                                   |
| HSD17B10     | IDT                      | Hs.PT.58.2288610 | ACAGTTGACAGCTACATCCAC         | CAAGCCAAGAAGTTAGGAAACAAC         | /56-FAM/AGCCAGAGC/ZEN/TGTTT<br>GCACATCCT/3IABkFQ/ |
| PRORP        | Thermo Fisher Scientific | Hs00206448_m1    |                               |                                  |                                                   |

**Table S3. Ribosome profiling adapters used in this study**

| ID                                | Sequence                                                                                                     | Type  | Purpose                                         |
|-----------------------------------|--------------------------------------------------------------------------------------------------------------|-------|-------------------------------------------------|
| oBZ207_profiling_bar11            | CAAGCAGAAGACGGCATAACGAGATgagcttGTGACTGGAGTTCAGACGTGTGCTCTCCG                                                 | oligo | ribosome profiling PCR R                        |
| oBZ208_profiling_bar12            | CAAGCAGAAGACGGCATAACGAGATttaaagGTGACTGGAGTTCAGACGTGTGCTCTCCG                                                 | oligo | ribosome profiling PCR R                        |
| oBZ209_profiling_bar13            | CAAGCAGAAGACGGCATAACGAGATaacttgGTGACTGGAGTTCAGACGTGTGCTCTCCG                                                 | oligo | ribosome profiling PCR R                        |
| oBZ210_profiling_bar14            | CAAGCAGAAGACGGCATAACGAGATctggacGTGACTGGAGTTCAGACGTGTGCTCTCCG                                                 | oligo | ribosome profiling PCR R                        |
| oBZ211_profiling_bar15            | CAAGCAGAAGACGGCATAACGAGATggtccaGTGACTGGAGTTCAGACGTGTGCTCTCCG                                                 | oligo | ribosome profiling PCR R                        |
| oBZ212_profiling_bar16            | CAAGCAGAAGACGGCATAACGAGATtcaagtGTGACTGGAGTTCAGACGTGTGCTCTCCG                                                 | oligo | ribosome profiling PCR R                        |
| oBZ287_profiling_F_NINI2          | AATGATACGGCGACCACCGAGATCTACAC                                                                                | oligo | ribosome profiling PCR F                        |
| oBZ407_cloning_linker_2_preA_rand | AppNNNNNNCACTCGGGCACCAAGGAC/3ddC/                                                                            | oligo | preadenylated adaptor for ribosome profiling    |
| oBZ408_RN3_linker2_RT             | /5Phos/RNNNAGATCGGAAGAGCGTCGTGTAGGGAAAGAGTGTAGATCTCGGTGGTCGC/iSP18/TT CAGACGTGTGCTCTCCGATCTGTCTTGGTGCCCGAGTG | oligo | circularizable RT primer for ribosome profiling |

**Table S4. RNA-Seq adapters used in this study**

| ID                       | Sequence |
|--------------------------|----------|
| TruSeq Adapter, Index 5  | ACAGTG   |
| TruSeq Adapter, Index 6  | GCCAAT   |
| TruSeq Adapter, Index 7  | CAGATC   |
| TruSeq Adapter, Index 8  | ACTTGA   |
| TruSeq Adapter, Index 9  | GATCAG   |
| TruSeq Adapter, Index 10 | TAGCTT   |

**Dataset S1 (separate file).** Pearson's correlation coefficients obtained correlating *N6AMT1* CCLE gene effect with each of the 15677 non-essential genes in the CCLE database across 1,095 cell lines.

**Dataset S2 (separate file).** Gene set enrichment analysis of Pearson's correlation data (from Dataset S1).

**Dataset S3 (separate file).** Output from DEseq analysis of RNA-Seq data.

**Dataset S4 (separate file).** Gene set enrichment analysis of  $\log_2$ (fold changes) of RNA seq analysis (Dataset S3) using the gene ontology database.

**Dataset S5 (separate file).** Gene set enrichment analysis of  $\log_2$  (fold changes) of RNA seq analysis of GEO dataset GSE131016 using the gene ontology database.

**Dataset S6 (separate file).** Output from DEseq analysis of Ribo-Seq data.

**Dataset S7 (separate file).** Gene set enrichment analysis of  $\log_2$ (fold changes) of ribosome profiling dataset (Dataset S6) using the gene ontology database.

**Dataset S8 (separate file).** Gene set enrichment analysis of  $\log_2$ (fold changes) of ribosome profiling dataset (Dataset S6) using the MitoCarta MitoPathways database.

**Dataset S9 (separate file).** Gene set enrichment analysis of  $\log_2$  (fold changes) of translation efficiencies (calculated from the Ribo-Seq and RNA-seq datasets) using the gene ontology.

**Dataset S10 (separate file).** Gene set enrichment analysis of  $\log_2$  (fold changes) of translation efficiencies (calculated from the Ribo-Seq and RNA-seq datasets) using the MitoCarta MitoPathways database.

**Dataset S11 (separate file).** mePROD analysis of *N6AMT1*-depleted vs control K562 cell lines.

**Dataset S12 (separate file).** mePROD<sup>mt</sup> analysis of isolated mitochondria from *N6AMT1*-depleted vs control K562 cell lines.

**Dataset S13 (separate file).** Proteomics analysis of *N6AMT1*-depleted vs control K562 cell lines.
